# Supplementary material for: Genomic profiling and pre-clinical modelling of breast cancer leptomeningeal metastasis reveals acquisition of a lobular-like phenotype
Source: PubMed Central journal article supplement (PMC10654396; doi:10.1038/s41467-023-43242-x), 2023-11-16
Supplement: 41467_2023_43242_MOESM1_ESM.pdf [file 41467_2023_43242_MOESM1_ESM.pdf]

**Genomic profiling and pre-clinical modelling of breast cancer leptomeningeal metastasis reveals acquisition of a lobular-like phenotype**

Amanda Fitzpatrick, Marjan Iravani, Adam Mills, David Vicente, Thanussuyah Alaguthurai, Ioannis Roxanis, Nicholas C. Turner, Syed Haider, Andrew N.J. Tutt and Clare M. Isacke

**Supplementary Information**

**Supplementary Table 1** | Clinicopathological characteristics of patients in BCLM cohort

**Supplementary Table 2** | Whole exome sequencing and variant calling metrics

**Supplementary Table 3** | Characteristics of BCLM genomic evolution

**Supplementary Table 4** | Frequently altered cancer driver genes in plasma cfDNA

**Supplementary Table 5** | OncoKB actionable gene alterations in CSF cfDNA

**Supplementary Table 6** | Immunohistochemical scoring of primary tumours and matched BCLM PDOs

**Supplementary Table 7** | STR authentication of cell lines and PDOs

**Supplementary Table 8** | Antibodies used for immunohistochemistry

**Supplementary Figure 1** | Metrics of samples undergoing WES

**Supplementary Figures 2-5** | Trinucleotide context of single nucleotide substitutions in CSF cfDNA, plasma cfDNA, primary tumour, metastasis.

**Supplementary Figure 6** | Correlation of CSF cfDNA unique variants with clinical history

**Supplementary Figures 7-13** | BCLM clonal evolution modelling

**Supplementary Figure 14** | Cancer-associated mutation and copy number landscape of all matched samples

**Supplementary Figure 15** | Comparison of CNA frequency between sample type

**Supplementary Figure 16** | BCLM-enriched genomic alterations in biological processes

**Supplementary Figure 17** | Comparison of genomic findings in BCLM PDOs and matched primary tumour, plasma cfDNA or metastatic tissue samples

**Supplementary Figure 18** | Transduction of BCLM PDOs to express mCherry and luciferase

**Supplementary Data 1** | Somatic variants identified by WES (excluding synonymous SNVs)

**Supplementary Data 2** | Chemotherapy-related SBS mutational signatures

**Supplementary Data 3** | SBS mutational signatures across sample types

**Supplementary Data 4** | Genomic alterations in BCLM vs. MBC cohort

**Supplementary Data 5** | Copy number alterations (standardised log<sub>2</sub> ratio) determined by CNVkit analysis of WES data

**Supplementary Table 1 | Clinicopathological characteristics of patients in BCLM cohort**

|                                                 | <b>Patients (n = 21)</b> |       |
|-------------------------------------------------|--------------------------|-------|
|                                                 | <i>n</i>                 | %     |
| <b>Age (years)</b>                              |                          |       |
| Median                                          | 52                       |       |
| Range                                           | 28 - 73                  |       |
| <b>Time from pBC (years)</b>                    |                          |       |
| Median                                          | 4.4                      |       |
| Range                                           | 0.70 - 14.7              |       |
| <b>Time from mBC (years)</b>                    |                          |       |
| Median                                          | 1.1                      |       |
| Range                                           | 0 - 6.5                  |       |
| <b>Gender</b>                                   |                          |       |
| Female                                          | 21                       | 100   |
| Male                                            | 0                        | 0     |
| <b>Histological subtype</b>                     |                          |       |
| Lobular                                         | 11                       | 52.39 |
| Mixed lobular/NST                               | 1                        | 4.76  |
| NST                                             | 7                        | 33.33 |
| Micropapillary                                  | 1                        | 4.76  |
| Apocrine                                        | 1                        | 4.76  |
| <b>Receptor subtype (primary tumour)</b>        |                          |       |
| ER+ HER2-                                       | 13                       | 61.90 |
| ER+ HER2+                                       | 2                        | 9.52  |
| ER- HER2+                                       | 1                        | 4.76  |
| TN                                              | 5                        | 23.81 |
| <b>Staging at diagnosis</b>                     |                          |       |
| N0                                              | 5                        | 23.81 |
| N1+                                             | 9                        | 42.86 |
| unknown N                                       | 1                        | 4.76  |
| M1                                              | 6                        | 28.57 |
| <b>Chemotherapy (adjuvant/neoadjuvant)</b>      |                          |       |
| Yes                                             | 14                       | 66.67 |
| No                                              | 1                        | 4.76  |
| N/A (M1)                                        | 6                        | 28.57 |
| <b>Endocrine therapy (adjuvant/neoadjuvant)</b> |                          |       |
| Tamoxifen                                       | 3                        | 20.00 |
| Tamoxifen then AI                               | 3                        | 20.00 |
| AI                                              | 4                        | 26.67 |
| N/A (M1)                                        | 5                        | 33.33 |
| <b>Other metastatic sites</b>                   |                          |       |
| None (BCLM only)                                | 3                        | 14.29 |
| Brain parenchyma                                | 7                        | 33.33 |
| Synchronous                                     | 2                        | 9.52  |
| Metachronous                                    | 5                        | 23.81 |
| Bone                                            | 15                       | 71.43 |
| Serosal                                         | 7                        | 33.33 |
| Soft tissue                                     | 7                        | 33.33 |
| Liver                                           | 4                        | 19.05 |
| Ovary                                           | 3                        | 14.29 |
| Nodal                                           | 3                        | 14.29 |
| Adrenal                                         | 1                        | 4.76  |
| Lung                                            | 1                        | 4.76  |

AI, aromatase inhibitor; BCLM, breast cancer leptomeningeal metastasis; ER, oestrogen receptor; HER2, human epidermal growth factor receptor 2; M1, metastatic stage 1; mBC, metastatic breast cancer; N, nodal status; N/A, not applicable; pBC, primary breast cancer; TN, triple negative.

**Supplementary Table 2 | Whole exome sequencing and variant calling metrics**

|                       | <b>Mean coverage<br/>(Picard)</b> | <b>Somatic<br/>variants (total)</b> | <b>SNV (total)</b>    | <b>Indel (total)</b>  |
|-----------------------|-----------------------------------|-------------------------------------|-----------------------|-----------------------|
|                       | <i>Median (IQR)</i>               | <i>Median (Range)</i>               | <i>Median (Range)</i> | <i>Median (Range)</i> |
| <b>CSF cfDNA</b>      | 164.7 (104.8 - 211)               | 125 (40 - 1196)                     | 112 (36 - 782)        | 9 (4 - 560)           |
| <b>Plasma cfDNA</b>   | 316.9 (283.7 - 362.3)             | 124 (34 - 464)                      | 116 (30 - 379)        | 7 (3 - 116)           |
| <b>Primary tumour</b> | 195.6 (131.9 - 236.4)             | 80 (43 - 700)                       | 76 (42 - 373)         | 7 (1 - 327)           |
| <b>Metastasis</b>     | 211.3 (178.3 - 233.9)             | 76 (46 - 418)                       | 70 (43 - 279)         | 5 (3 - 139)           |
| <b>Germline</b>       | 106 (100.1 - 117.8)               | - (-)                               | - (-)                 | - (-)                 |

CSF, cerebrospinal fluid; IQR,interquartile range; SNV,single nucleotide variation.

**Supplementary Table 3 | Characteristics of BCLM genomic evolution**

| <b>Study ID</b> | <b>CSF seeding from primary tumour</b> | <b>CSF and plasma evolution</b> | <b>Metastatic seeding pattern</b> |
|-----------------|----------------------------------------|---------------------------------|-----------------------------------|
| <b>KCL566</b>   | early                                  | divergent                       | monophyletic                      |
| <b>RMH010</b>   | early                                  | divergent                       | monophyletic                      |
| <b>KCL590</b>   | early                                  | divergent                       | monophyletic                      |
| <b>KCL523</b>   | early                                  | divergent                       | monophyletic                      |
| <b>KCL610</b>   | early                                  | divergent                       | monophyletic                      |
| <b>KCL499</b>   | early                                  | divergent                       | monophyletic                      |
| <b>KCL448</b>   | early                                  | divergent                       | monophyletic                      |
| <b>KCL622</b>   | early                                  | linear                          | monophyletic                      |
| <b>KCL553</b>   | early                                  | N/A                             | polyphyletic                      |
| <b>KCL320</b>   | early                                  | N/A                             | N/A                               |
| <b>KCL617</b>   | early                                  | N/A                             | N/A                               |
| <b>KCL449</b>   | early                                  | N/A                             | N/A                               |
| <b>KCL148</b>   | early                                  | N/A                             | N/A                               |
| <b>KCL450</b>   | early                                  | N/A                             | N/A                               |
| <b>KCL616</b>   | early                                  | N/A                             | N/A                               |
| <b>KCL680</b>   | early                                  | N/A                             | N/A                               |
| <b>RMH008</b>   | N/A                                    | divergent                       | N/A                               |
| <b>KCL658</b>   | N/A                                    | divergent                       | N/A                               |
| <b>KCL650</b>   | N/A                                    | linear                          | N/A                               |
| <b>RMH011</b>   | N/A                                    | N/A                             | N/A                               |

N/A, not assessable

**Supplementary Table 4** | Frequently altered cancer driver genes in plasma cfDNA

| Gene          | Altered in plasma | Altered in plasma (unique) | Total plasma samples sequenced | % of plasma samples with alteration (total) | % plasma samples with alteration (unique to plasma cfDNA) | Frequently altered in CSF cfDNA? |
|---------------|-------------------|----------------------------|--------------------------------|---------------------------------------------|-----------------------------------------------------------|----------------------------------|
| <i>PER1</i>   | 5                 | 5                          | 11                             | 45%                                         | 45%                                                       | no                               |
| <i>TP53</i>   | 5                 | 0                          | 11                             | 45%                                         | 0%                                                        | yes                              |
| <i>SRSF2</i>  | 4                 | 3                          | 11                             | 36%                                         | 27%                                                       | no                               |
| <i>BRCA2</i>  | 4                 | 2                          | 11                             | 36%                                         | 18%                                                       | yes                              |
| <i>CDH1</i>   | 4                 | 0                          | 11                             | 36%                                         | 0%                                                        | yes                              |
| <i>MDM2</i>   | 4                 | 0                          | 11                             | 36%                                         | 0%                                                        | yes                              |
| <i>NUTM2A</i> | 3                 | 3                          | 11                             | 27%                                         | 27%                                                       | yes                              |
| <i>PTPN6</i>  | 3                 | 3                          | 11                             | 27%                                         | 27%                                                       | no                               |
| <i>STK11</i>  | 3                 | 3                          | 11                             | 27%                                         | 27%                                                       | no                               |
| <i>FLNA</i>   | 3                 | 2                          | 11                             | 27%                                         | 18%                                                       | no                               |
| <i>CCND1</i>  | 3                 | 0                          | 11                             | 27%                                         | 0%                                                        | yes                              |
| <i>HMGA2</i>  | 3                 | 0                          | 11                             | 27%                                         | 0%                                                        | no                               |
| <i>MUC16</i>  | 3                 | 0                          | 11                             | 27%                                         | 0%                                                        | yes                              |
| <i>PIK3CA</i> | 3                 | 0                          | 11                             | 27%                                         | 0%                                                        | yes                              |
| <i>PTEN</i>   | 3                 | 0                          | 11                             | 27%                                         | 0%                                                        | yes                              |
| <i>PTPRB</i>  | 3                 | 0                          | 11                             | 27%                                         | 0%                                                        | yes                              |
| <i>CALR</i>   | 2                 | 2                          | 11                             | 18%                                         | 18%                                                       | no                               |
| <i>DNAJB1</i> | 2                 | 2                          | 11                             | 18%                                         | 18%                                                       | no                               |
| <i>LYL1</i>   | 2                 | 2                          | 11                             | 18%                                         | 18%                                                       | no                               |
| <i>MUC4</i>   | 2                 | 2                          | 11                             | 18%                                         | 18%                                                       | no                               |
| <i>BAZ1A</i>  | 2                 | 1                          | 11                             | 18%                                         | 9%                                                        | no                               |
| <i>CLP1</i>   | 2                 | 1                          | 11                             | 18%                                         | 9%                                                        | no                               |
| <i>ERBB2</i>  | 2                 | 1                          | 11                             | 18%                                         | 9%                                                        | yes                              |
| <i>FAT1</i>   | 2                 | 1                          | 11                             | 18%                                         | 9%                                                        | no                               |
| <i>MYH11</i>  | 2                 | 1                          | 11                             | 18%                                         | 9%                                                        | no                               |
| <i>RB1</i>    | 2                 | 1                          | 11                             | 18%                                         | 9%                                                        | yes                              |
| <i>RUNX1</i>  | 2                 | 1                          | 11                             | 18%                                         | 9%                                                        | yes                              |
| <i>TFPT</i>   | 2                 | 1                          | 11                             | 18%                                         | 9%                                                        | no                               |
| <i>ATM</i>    | 2                 | 0                          | 11                             | 18%                                         | 0%                                                        | yes                              |
| <i>BCL11B</i> | 2                 | 0                          | 11                             | 18%                                         | 0%                                                        | no                               |
| <i>DROSHA</i> | 2                 | 0                          | 11                             | 18%                                         | 0%                                                        | no                               |
| <i>FAT4</i>   | 2                 | 0                          | 11                             | 18%                                         | 0%                                                        | no                               |
| <i>LRP1B</i>  | 2                 | 0                          | 11                             | 18%                                         | 0%                                                        | no                               |
| <i>MYCN</i>   | 2                 | 0                          | 11                             | 18%                                         | 0%                                                        | no                               |
| <i>ZNF429</i> | 2                 | 0                          | 11                             | 18%                                         | 0%                                                        | no                               |

**Supplementary Table 5 | OncoKB actionable gene alterations in CSF cfDNA**

| Patient ID                                                                              | Gene          | Alteration type      | Alteration detail | Therapeutic level (any cancer) | Therapeutic level (breast cancer) | Predicts/may predict response to* | Shared with primary tumour |
|-----------------------------------------------------------------------------------------|---------------|----------------------|-------------------|--------------------------------|-----------------------------------|-----------------------------------|----------------------------|
| KCL148                                                                                  | <i>BRCA1</i>  | Frameshift insertion | p.Y655Vfs*18      | 1                              | 3A                                | Olaparib                          | not shared                 |
| KCL566                                                                                  | N/A           | High TMB             | TMB >10 muts/Mb   | 1                              | 1                                 | Pembrolizumab                     | not shared                 |
| KCL566                                                                                  | <i>NF1</i>    | Frameshift deletion  | p.Y1586Lfs*17     | 4                              | 4                                 | Trametinib; Cobimetinib           | not shared                 |
| KCL610                                                                                  | <i>BRCA2</i>  | Frameshift deletion  | p.N1599Lfs*18     | 1                              | 3A                                | Olaparib                          | not shared                 |
| KCL680                                                                                  | <i>ESR1</i>   | Nonsynonymous SNV    | p.Y537S           | 1                              | 1                                 | Fulvestrant                       | not shared                 |
| KCL148                                                                                  | N/A           | High TMB             | TMB >10 muts/Mb   | 1                              | 1                                 | Pembrolizumab                     | shared                     |
| KCL148                                                                                  | <i>ARID1A</i> | Frameshift deletion  | p.P1468Lfs*13     | 4                              | 4                                 | Tazemetostat                      | shared                     |
| KCL148                                                                                  | <i>PTEN</i>   | Frameshift insertion | p.E157Gfs*23      | 4                              | 4                                 | GSK2636771                        | shared                     |
| KCL148                                                                                  | <i>PTEN</i>   | Frameshift insertion | p.G251Vfs*6       | 4                              | 4                                 | GSK2636771                        | shared                     |
| KCL148                                                                                  | <i>PTCH1</i>  | Frameshift insertion | p.R1242Qfs*17     | 3B                             | none                              | Sonidegib, Vismodegib             | shared                     |
| KCL320                                                                                  | <i>PIK3CA</i> | Nonsynonymous SNV    | p.E542K           | 1                              | 1                                 | Alpelisib                         | shared                     |
| KCL448                                                                                  | <i>CDKN2A</i> | Stopgain             | p.R80X            | 4                              | 4                                 | Abemaciclib                       | shared                     |
| KCL449                                                                                  | <i>PIK3CA</i> | Nonsynonymous SNV    | p.H1047R          | 1                              | 1                                 | Alpelisib                         | shared                     |
| KCL450                                                                                  | <i>AKT1</i>   | Nonsynonymous SNV    | p.E17K            | 3A                             | 3A                                | Capivasertib                      | shared                     |
| KCL523                                                                                  | <i>BRCA2</i>  | Nonsynonymous SNV    | p.R3052W          | 1                              | 3A                                | Olaparib                          | shared                     |
| KCL523                                                                                  | <i>PIK3CA</i> | Nonsynonymous SNV    | p.N1044K          | 2                              | 2                                 | Alpelisib                         | shared                     |
| KCL553                                                                                  | <i>ARID1A</i> | Frameshift deletion  | p.Q548Hfs*65      | 4                              | 4                                 | Tazemetostat                      | shared                     |
| KCL566                                                                                  | <i>MDM2</i>   | Amplification        | Amplification     | 4                              | none                              | Milademetan                       | shared                     |
| KCL590                                                                                  | <i>MDM2</i>   | Amplification        | Amplification     | 4                              | none                              | Milademetan                       | shared                     |
| KCL610                                                                                  | <i>PTEN</i>   | Frameshift deletion  | p.F21Yfs*16       | 4                              | 4                                 | GSK2636771                        | shared                     |
| KCL610                                                                                  | <i>MDM2</i>   | Amplification        | Amplification     | 4                              | none                              | Milademetan                       | shared                     |
| KCL616                                                                                  | <i>PIK3CA</i> | Nonsynonymous SNV    | p.H1047R          | 1                              | 1                                 | Alpelisib                         | shared                     |
| KCL616                                                                                  | <i>ARID1A</i> | Stopgain             | p.Q920X           | 4                              | 4                                 | Tazemetostat                      | shared                     |
| KCL617                                                                                  | <i>ERBB2</i>  | Amplification        | Amplification     | 1                              | 1                                 | Trastuzumab                       | shared                     |
| KCL622                                                                                  | <i>ATM</i>    | Nonsynonymous SNV    | p.R337H           | 1                              | none                              | Olaparib                          | shared                     |
| KCL650                                                                                  | <i>ATM</i>    | Splice site          | Splice variant    | 1                              | none                              | Olaparib                          | shared                     |
| RMH008                                                                                  | <i>PIK3CA</i> | Nonsynonymous SNV    | p.E39K            | 2                              | 2                                 | Alpelisib                         | shared                     |
| RMH008                                                                                  | <i>ERBB2</i>  | Nonsynonymous SNV    | p.L755S           | 2                              | 3A                                | Neratinib                         | shared                     |
| RMH011                                                                                  | <i>ERBB2</i>  | Amplification        | Amplification     | 1                              | 1                                 | Trastuzumab                       | shared                     |
| *prediction of drug response not know for CNS metastasis; TMB, tumour mutational burden |               |                      |                   |                                |                                   |                                   |                            |

**Supplementary Table 6 | IHC scoring of primary tumours and matched BCLM PDOs**

| <b>Study ID</b> | <b>Primary tumour</b> | <b>BCLM PDO</b> |
|-----------------|-----------------------|-----------------|
| KCL320          | ER 8; HER2 0          | ER 0; HER2 3+   |
| KCL450          | ER 8; HER2 0          | ER 0; HER2 1+   |
| KCL566          | ER 6; HER2 0          | ER 3; HER2 2+   |
| KCL622          | ER 0; HER2 0          | ER 0; HER2 0    |
| KCL625          | ER 3; HER2 0          | ER 0; HER2 1+   |

Scoring performed by independent pathologist (I.R.)



**Supplementary Table 7 | STR authentication of cell lines and PDOs**

| <b>Cell line/PDO ID</b> | <b>Last date authentication performed</b> |
|-------------------------|-------------------------------------------|
| DU4475                  | 30/03/2021                                |
| MDA-MB-134-VI           | 19/01/2021                                |
| T47D                    | 19/01/2021                                |
| SUM44PE                 | 19/01/2021                                |
| MCF7 <sup>CDH1+/+</sup> | 09/03/2017                                |
| MCF7 <sup>CDH1-/-</sup> | 09/03/2017                                |
| KCL320                  | 19/01/2021                                |
| KCL450                  | 30/03/2021                                |
| KCL566                  | 30/03/2021                                |
| KCL622                  | 30/03/2021                                |
| KCL645                  | 30/03/2021                                |

The results for all cell lines used agreed with the public databases, confirming the correct identity of each cell line used. The results for PDOs matched the original authentication and confirming the correct identity.

**Supplementary Table 8** | Antibodies used for immunohistochemistry.

| <b>Antibody</b> | <b>Species</b> | <b>Source (Catalogue no.)</b> | <b>Dilution</b> |
|-----------------|----------------|-------------------------------|-----------------|
| Alpha-catenin   | Rabbit         | Abcam (51032)                 | 1:100           |
| Beta-catenin    | Mouse          | BD Biosciences (610153)       | 1:2500          |
| E-cadherin      | Mouse          | Dako (M3612)                  | 1:50            |
| ER $\alpha$     | Rabbit         | Dako (M3643)                  | 1:80            |
| HER2            | N/A            | Dako (SK001)                  | N/A             |
| Lamin A/C       | Rabbit         | Abcam (108595)                | 1:750           |
| p120-catenin    | Mouse          | BD Biosciences (610134)       | 1:500           |

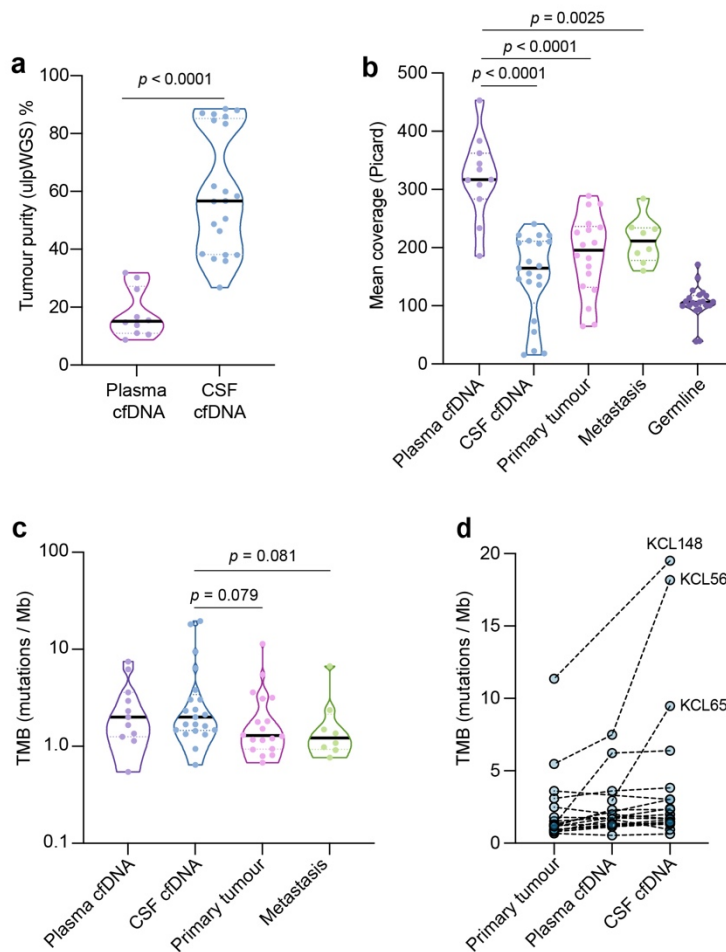

**Supplementary Fig. 1.** Metrics of samples undergoing WES. **a** Tumour purity of cfDNA assessed by ulpWGS (ultra-low-pass whole genome sequencing) within the concurrently collected CSF ( $n = 21$ ) and plasma ( $n = 11$ ) samples. The 10 plasma cfDNA samples which did not undergo WES (due to tumour content  $<10\%$ ) are not shown. Significance by Mann-Whitney test, two-tailed. **b** Sequencing coverage of all samples. Plasma cfDNA,  $n = 11$ ; CSF cfDNA,  $n = 21$ ; primary tumour,  $n = 18$ ; metastasis,  $n = 8$ ; germline,  $n = 21$ . Significance by Mann-Whitney test, two-tailed. **c** Tumour mutational burden (TMB) in samples shown in panel b. Significance by Mann-Whitney test, two-tailed,  $p$ -values  $<0.1$  are shown. **d** Matched comparison of TMB in primary tumour, plasma cfDNA and CSF cfDNA samples collected from individual patients. Source data for all panels are provided as a Source Data file.

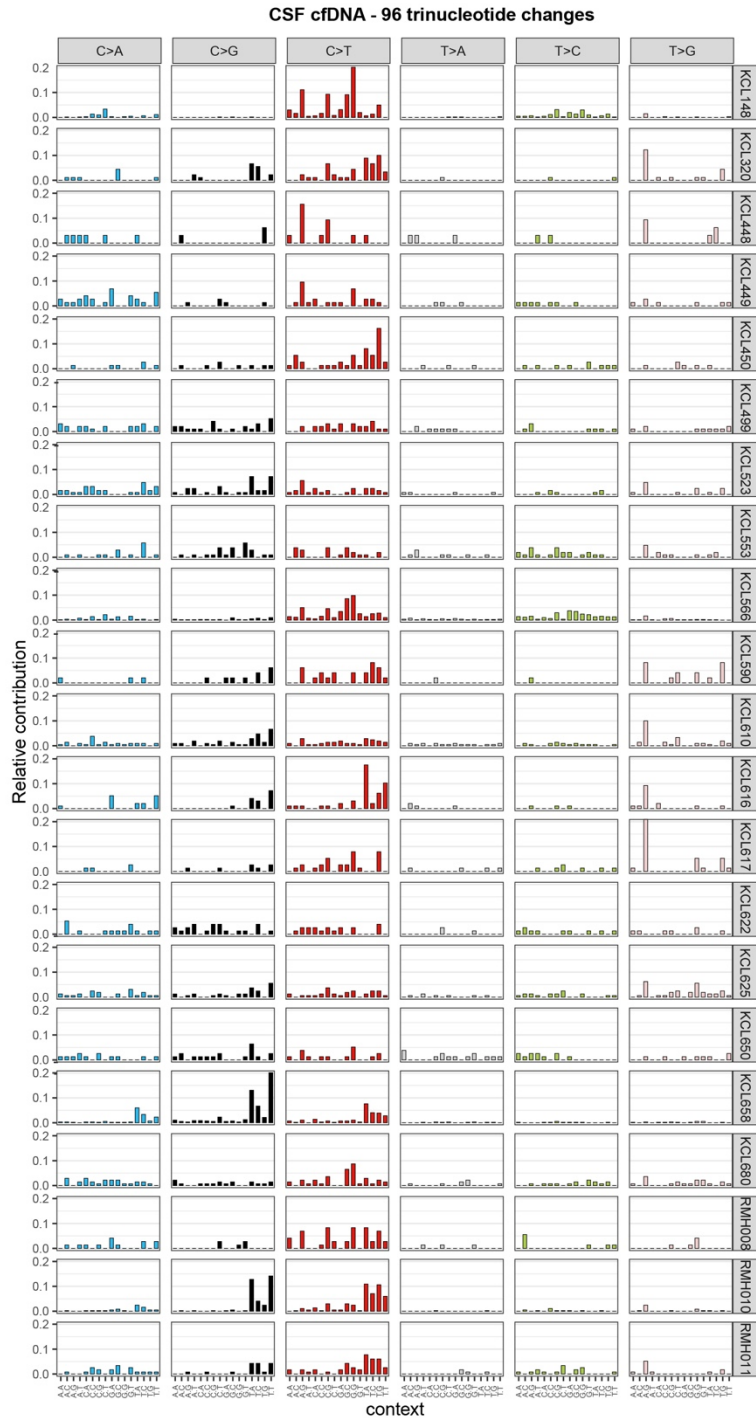

**Supplementary Fig. 2.** Trinucleotide context of single nucleotide substitutions in CSF cfDNA. Data associated with Figure 1c and Supplementary Data 2 and 3. The x-axis indicates the 5' and 3' nucleotides for each of the top panel substitutions for the three base-pair motifs. The y-axis shows the single-base substitution (SBS) composition of each sample by the 96 trinucleotide sequence motifs, grouped by sample type.

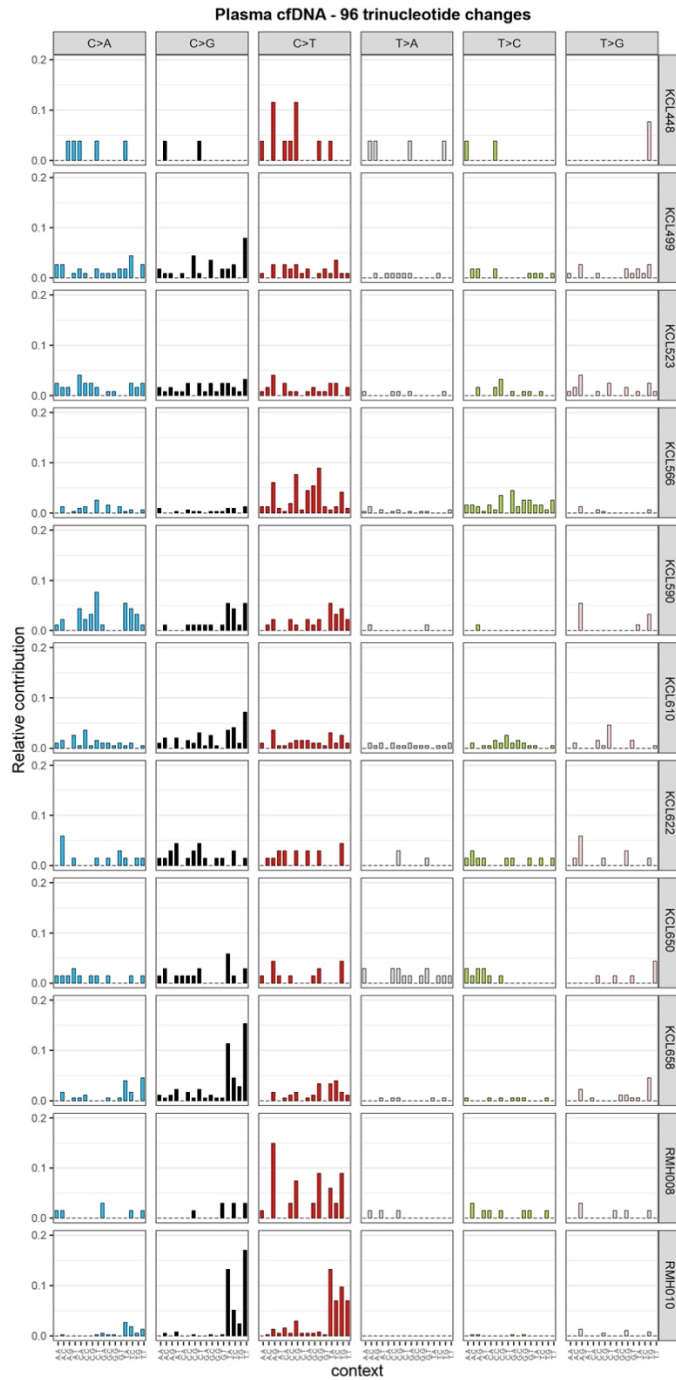

**Supplementary Fig. 3.** Trinucleotide context of single nucleotide substitutions in plasma cfDNA. Data associated with Figure 1c and Supplementary Data 2 and 3. The x-axis indicates the 5' and 3' nucleotides for each of the top panel substitutions for the three base-pair motifs. The y-axis shows the single-base substitution (SBS) composition of each sample by the 96 trinucleotide sequence motifs, grouped by sample type.

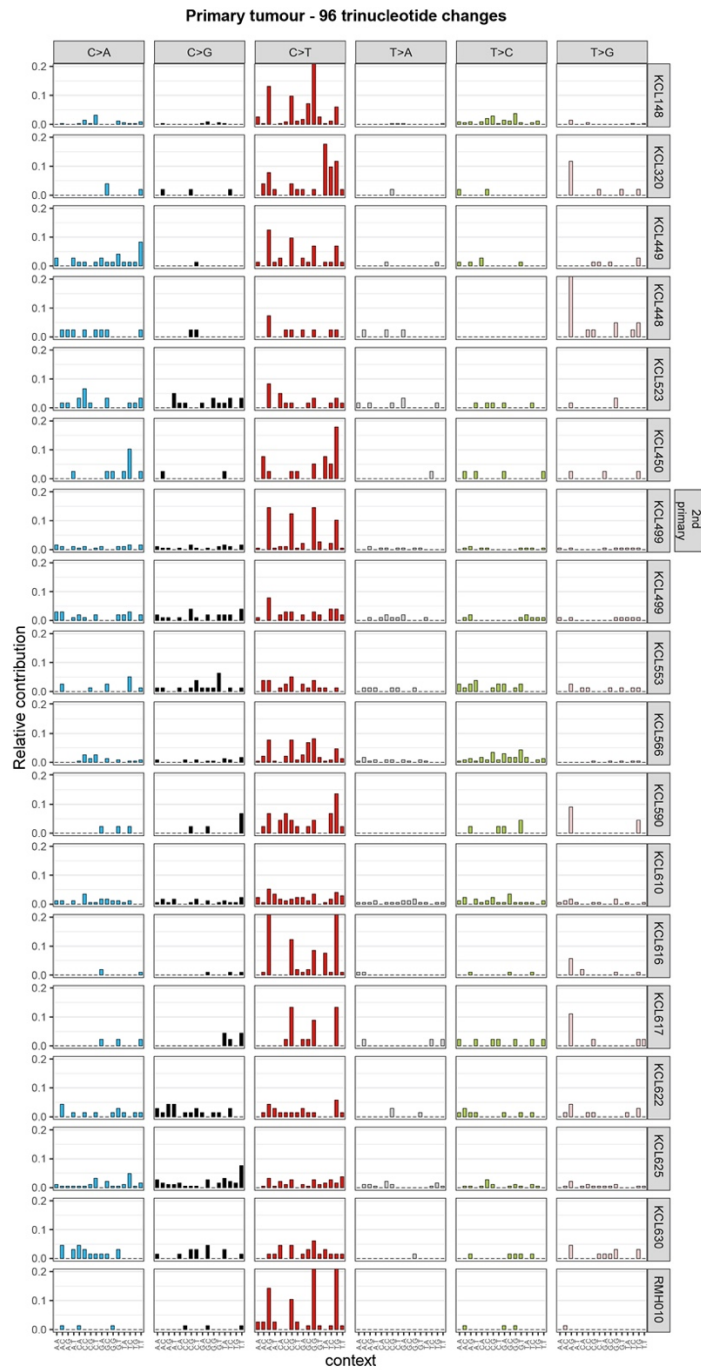

**Supplementary Fig. 4.** Trinucleotide context of single nucleotide substitutions in primary tumours. Data associated with Figure 1c and Supplementary Data 2 and 3. The x-axis indicates the 5' and 3' nucleotides for each of the top panel substitutions for the three base-pair motifs. The y-axis shows the single-base substitution (SBS) composition of each sample by the 96 trinucleotide sequence motifs, grouped by sample type.

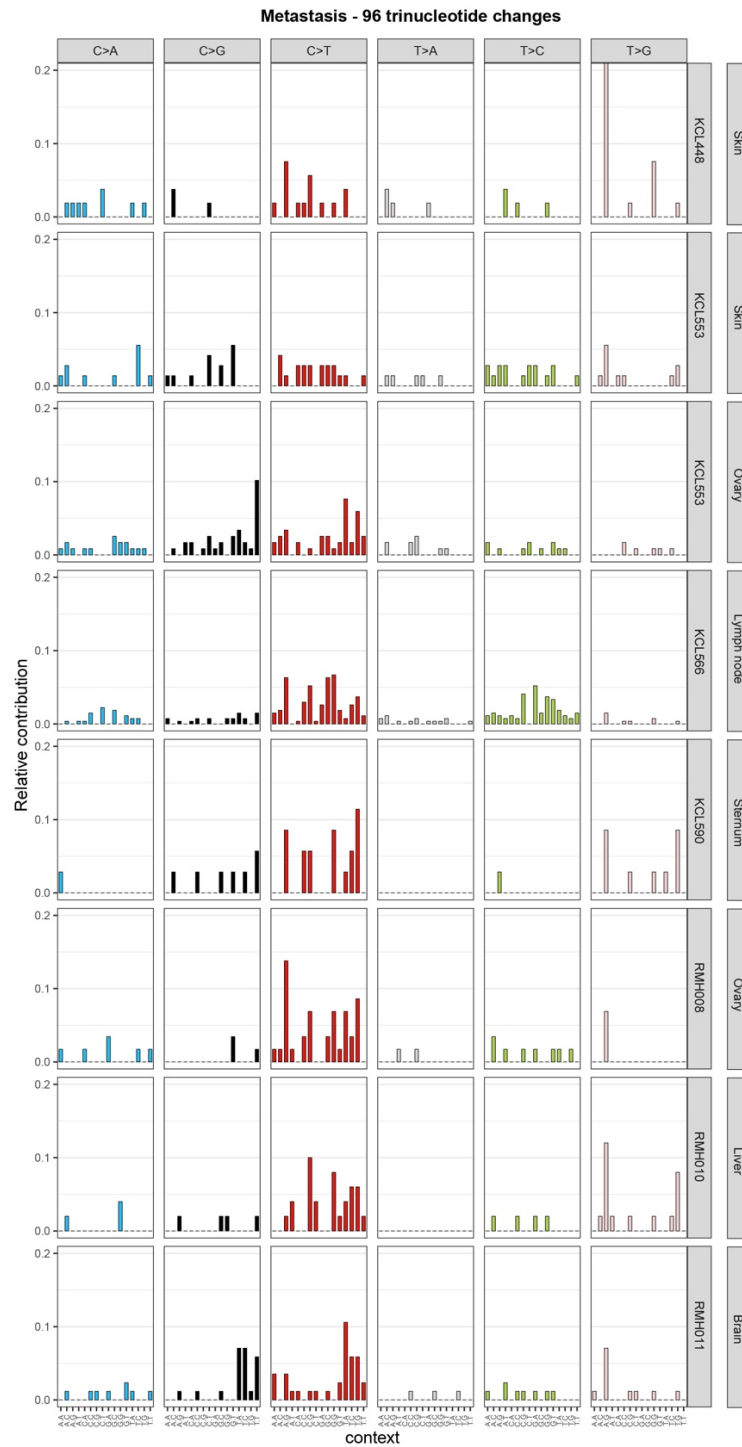

**Supplementary Fig. 5.** Trinucleotide context of single nucleotide substitutions in metastatic samples. Data associated with Figure 1c and Supplementary Data 2 and 3. The x-axis indicates the 5' and 3' nucleotides for each of the top panel substitutions for the three base-pair motifs. The y-axis shows the single-base substitution (SBS) composition of each sample by the 96 trinucleotide sequence motifs, grouped by sample type.

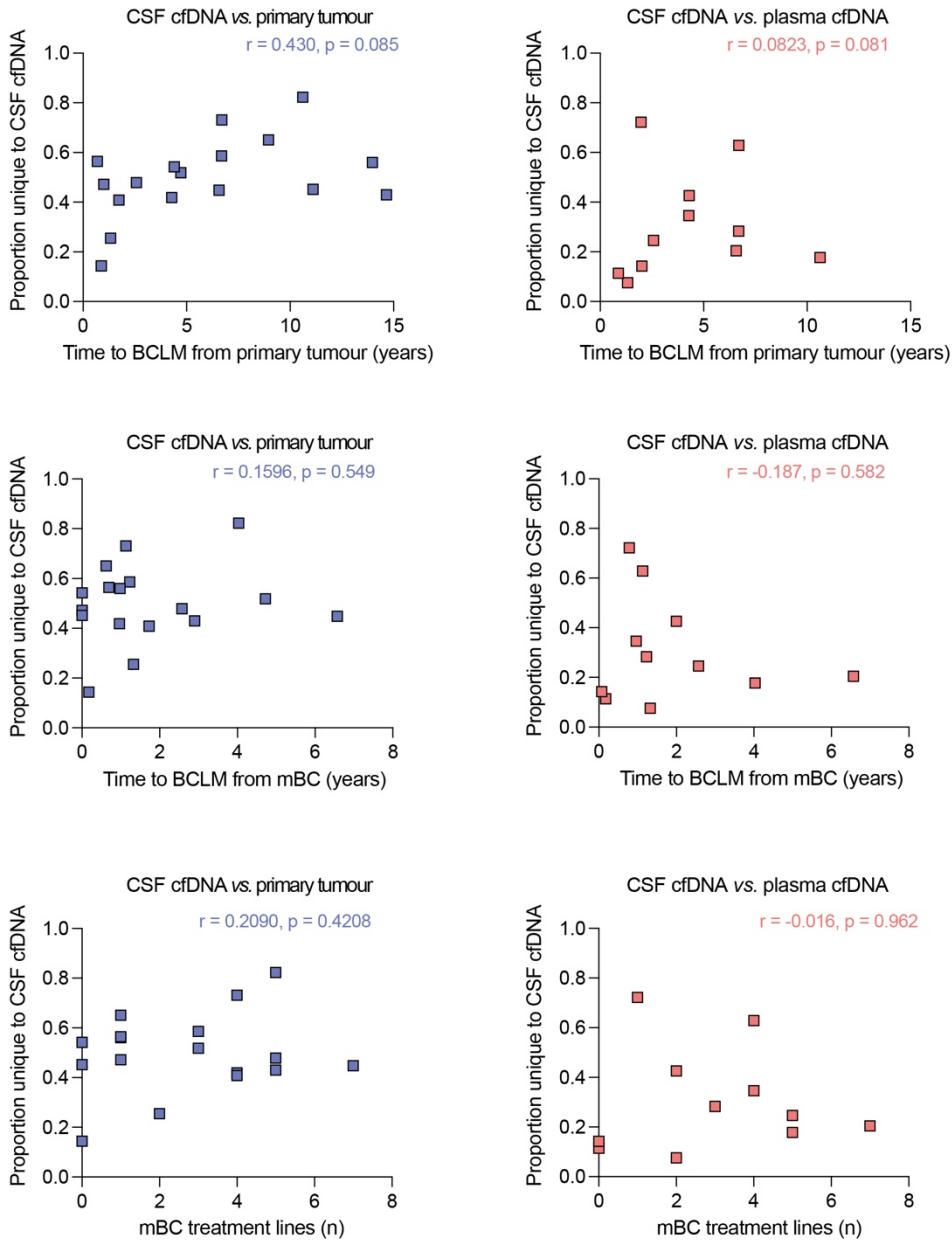

**Supplementary Fig. 6.** Correlation of CSF cfDNA unique variants with clinical history. Correlation of proportion of variants unique to CSF cfDNA vs. primary tumour (left panels) ( $n = 17$  pairs) and CSF cfDNA vs. matched plasma cfDNA ( $n = 11$  pairs) (right panels) with time to BCLM diagnosis from primary tumour diagnosis, time to BCLM diagnosis time from diagnosis of metastatic breast cancer, and to number of previous systemic therapies (treatment lines) completed. Pearson's  $r$  correlation, two-tailed  $p$ -values. Source data are provided as a Source Data file.



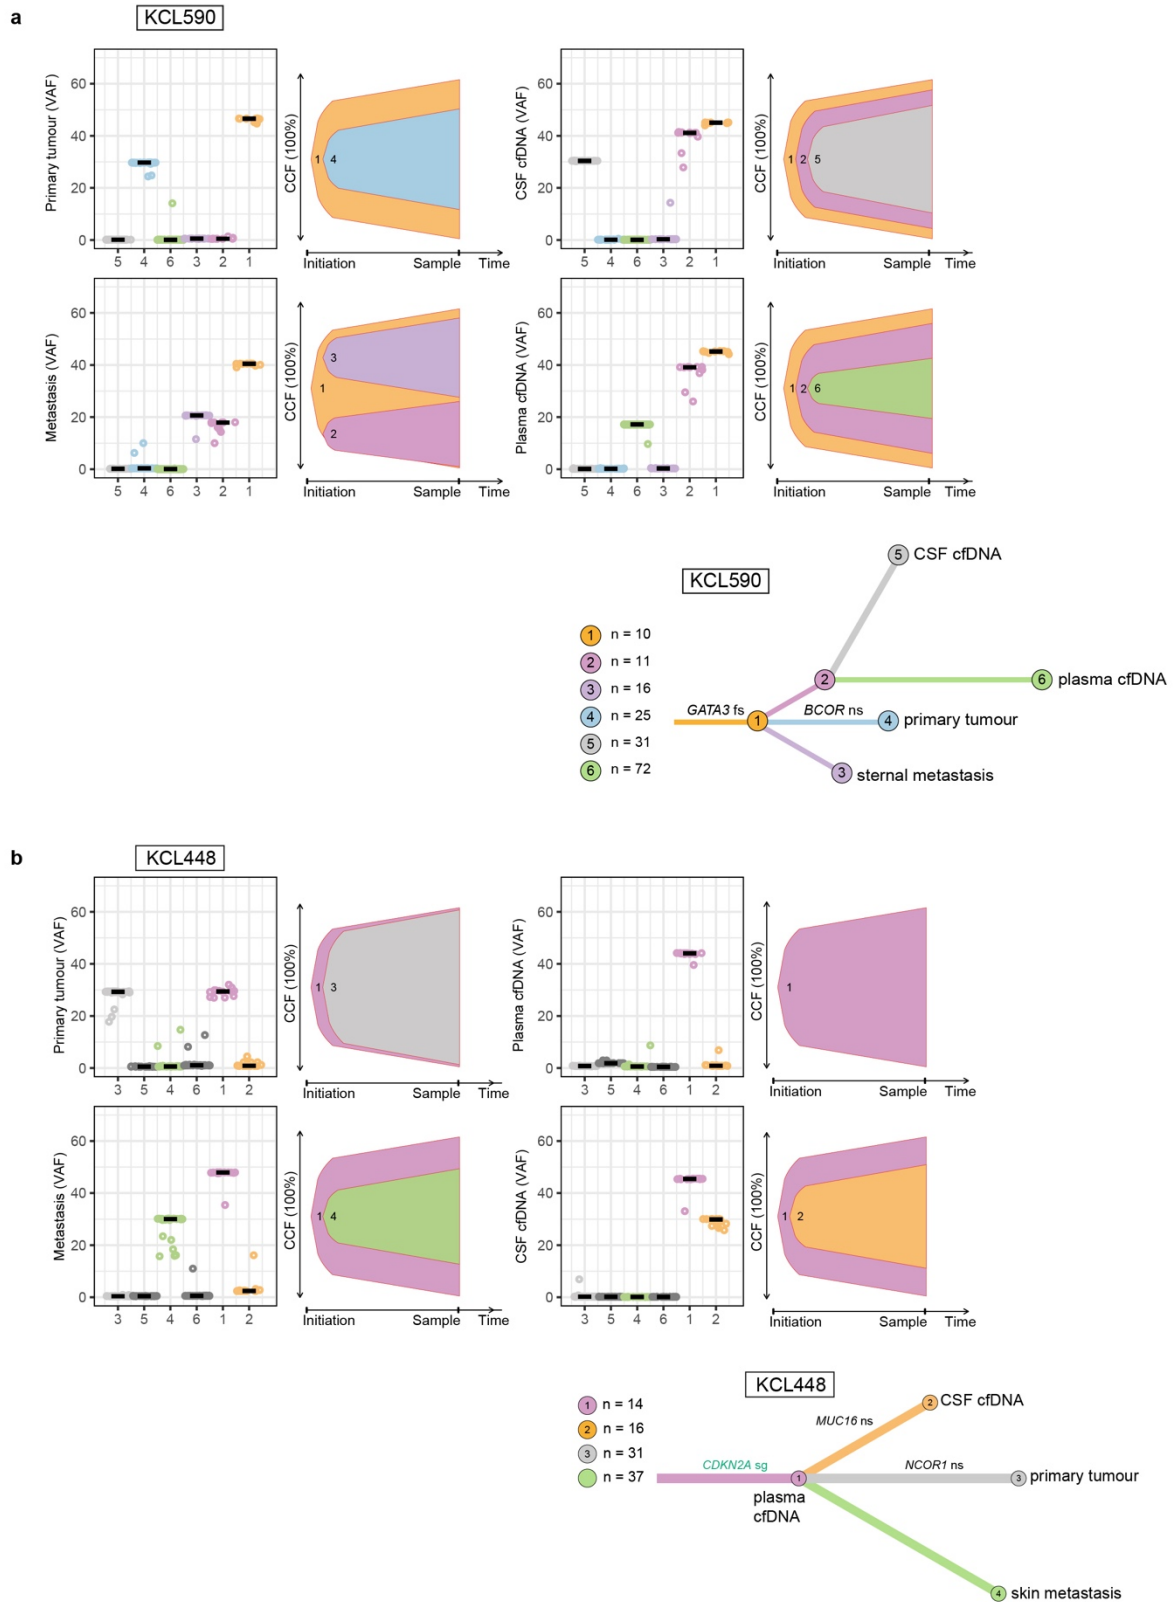

Supplementary Fig. 7. BCLM clonal evolution modelling. Data associated with Figure 2.

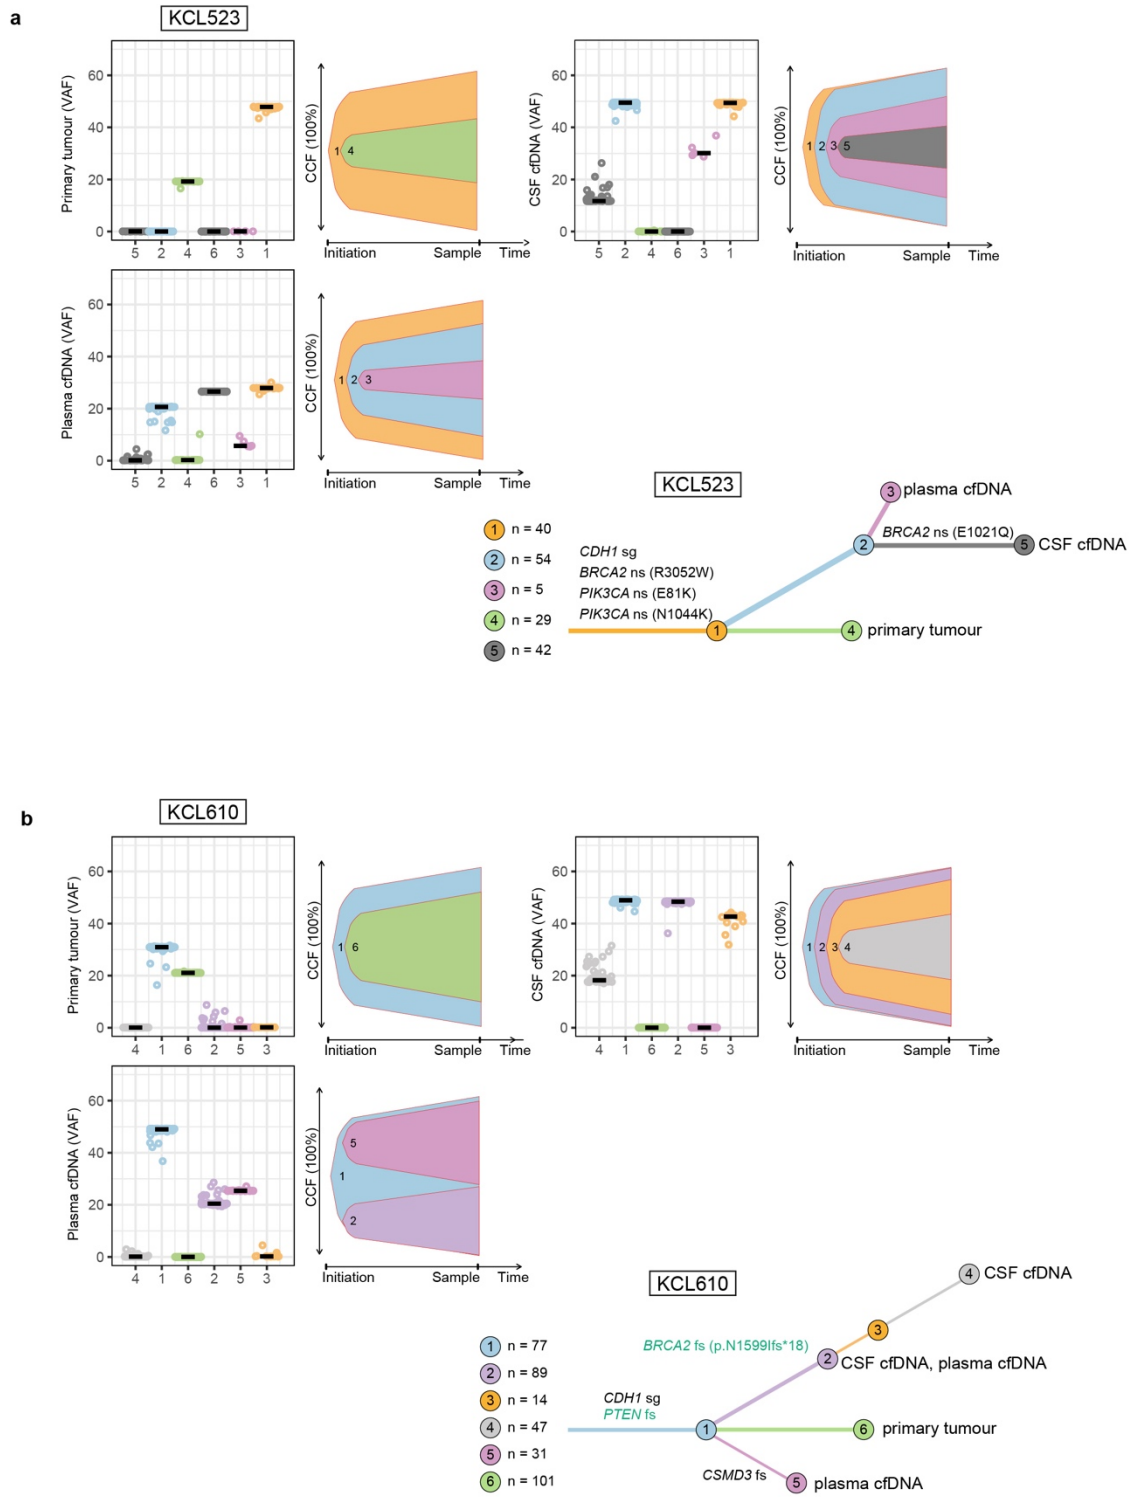

**Supplementary Fig. 8.** BCLM clonal evolution modelling. Data associated with Figure 2.

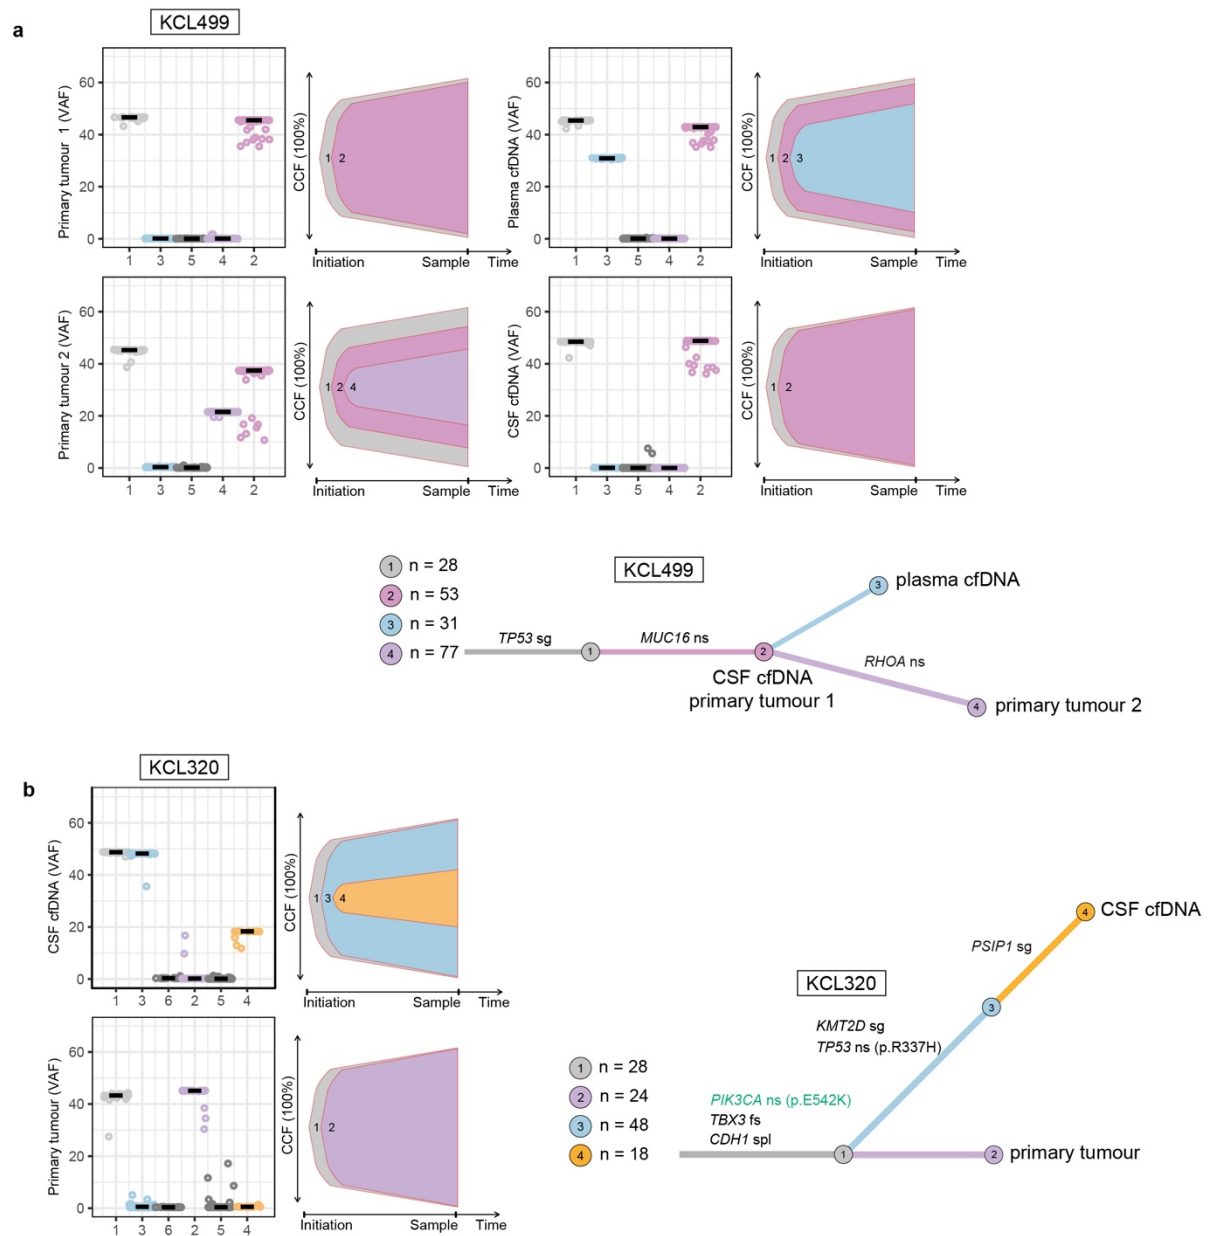

**Supplementary Fig. 9.** BCLM clonal evolution modelling. Data associated with Figure 2.

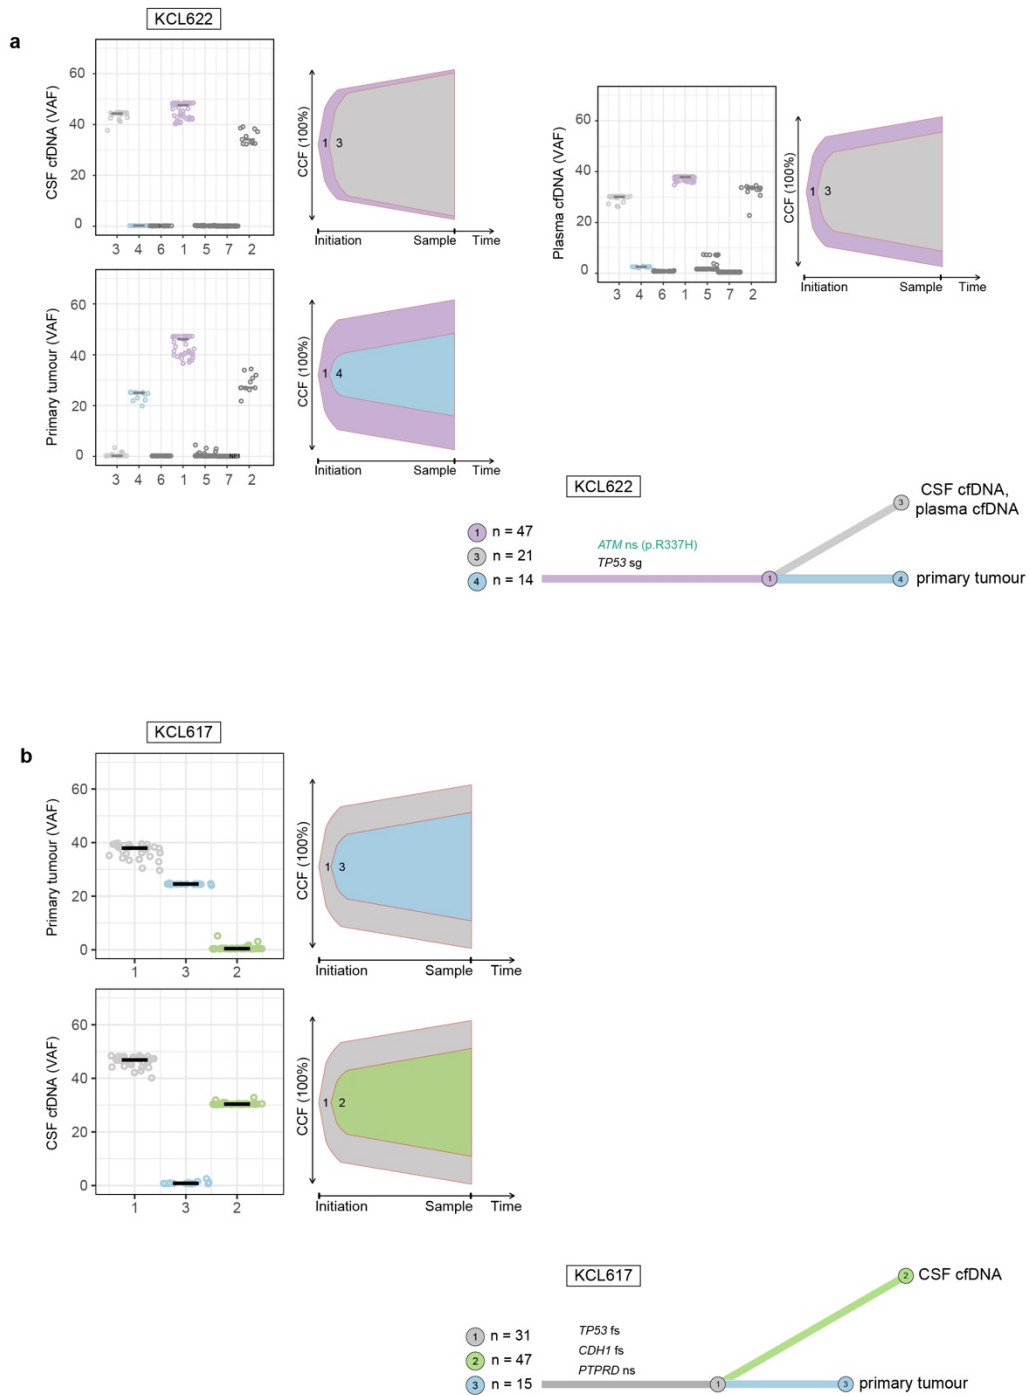

**Supplementary Fig. 10.** BCLM clonal evolution modelling. Data associated with Figure 2.

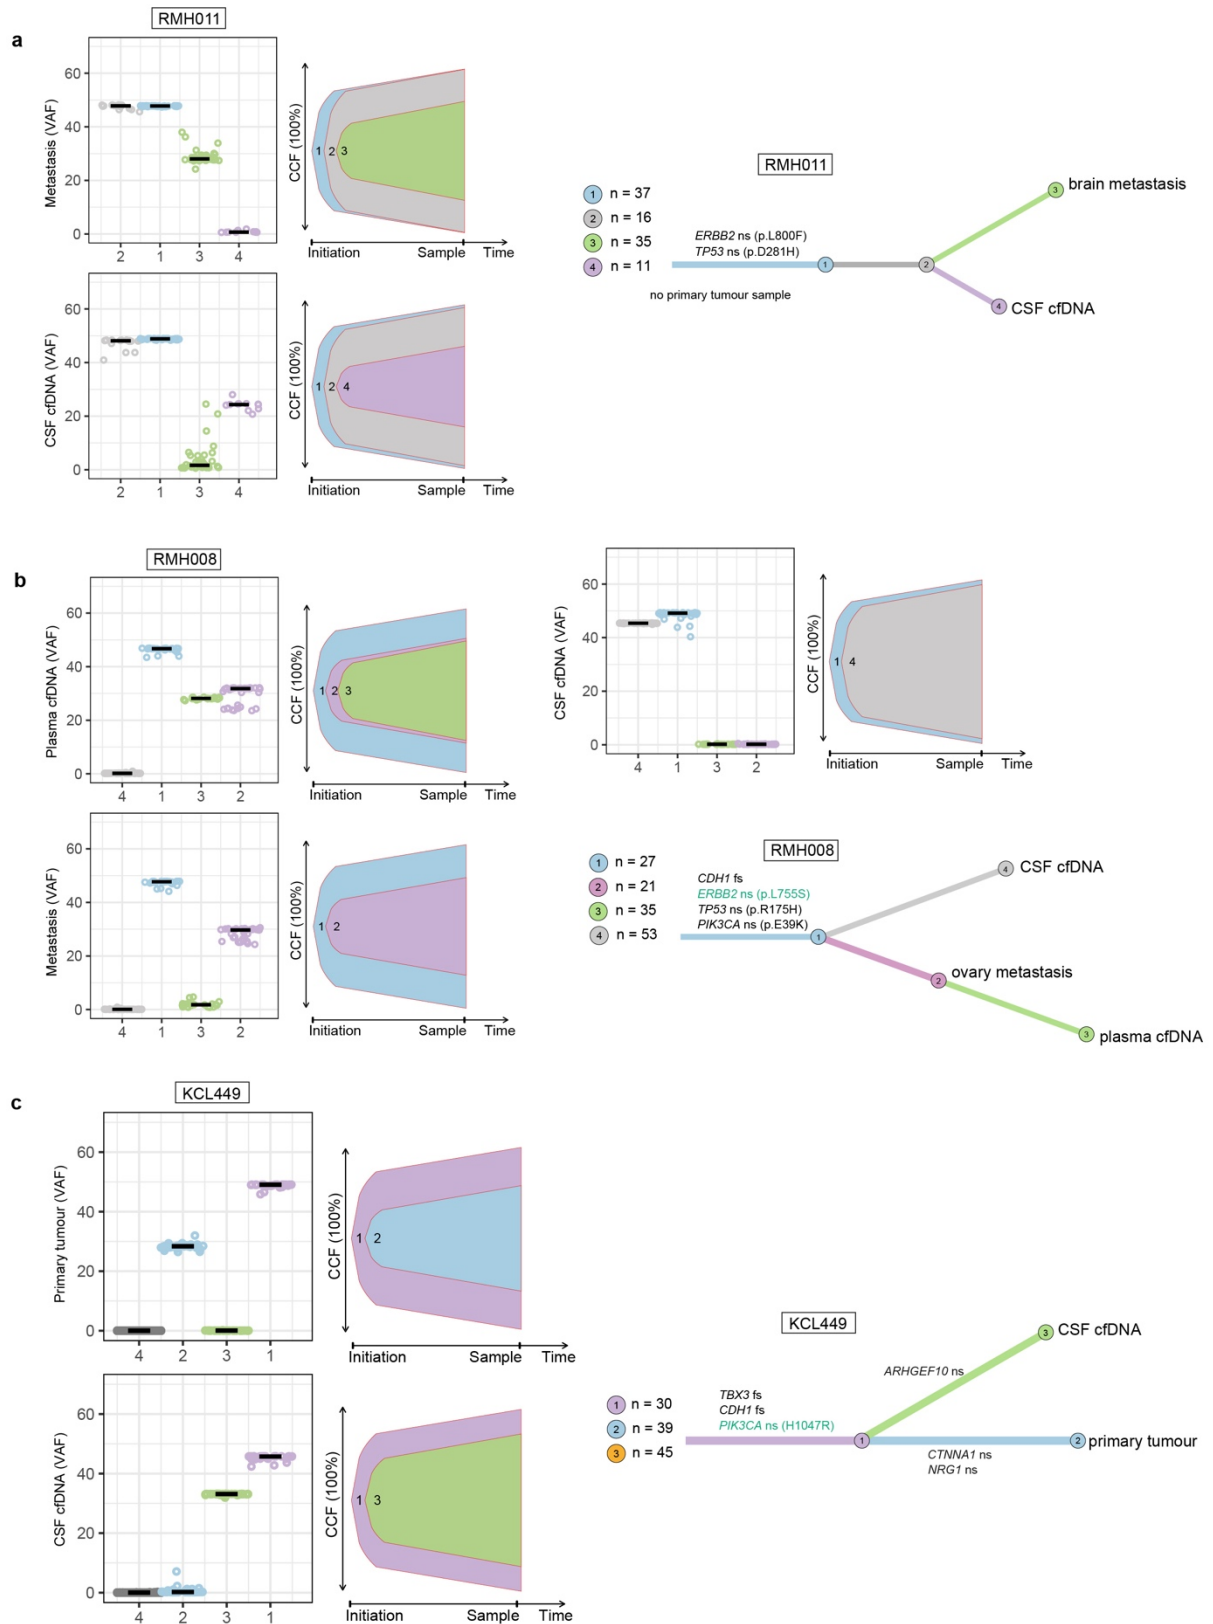

**Supplementary Fig. 11. BCLM clonal evolution modelling. Data associated with Figure 2.**

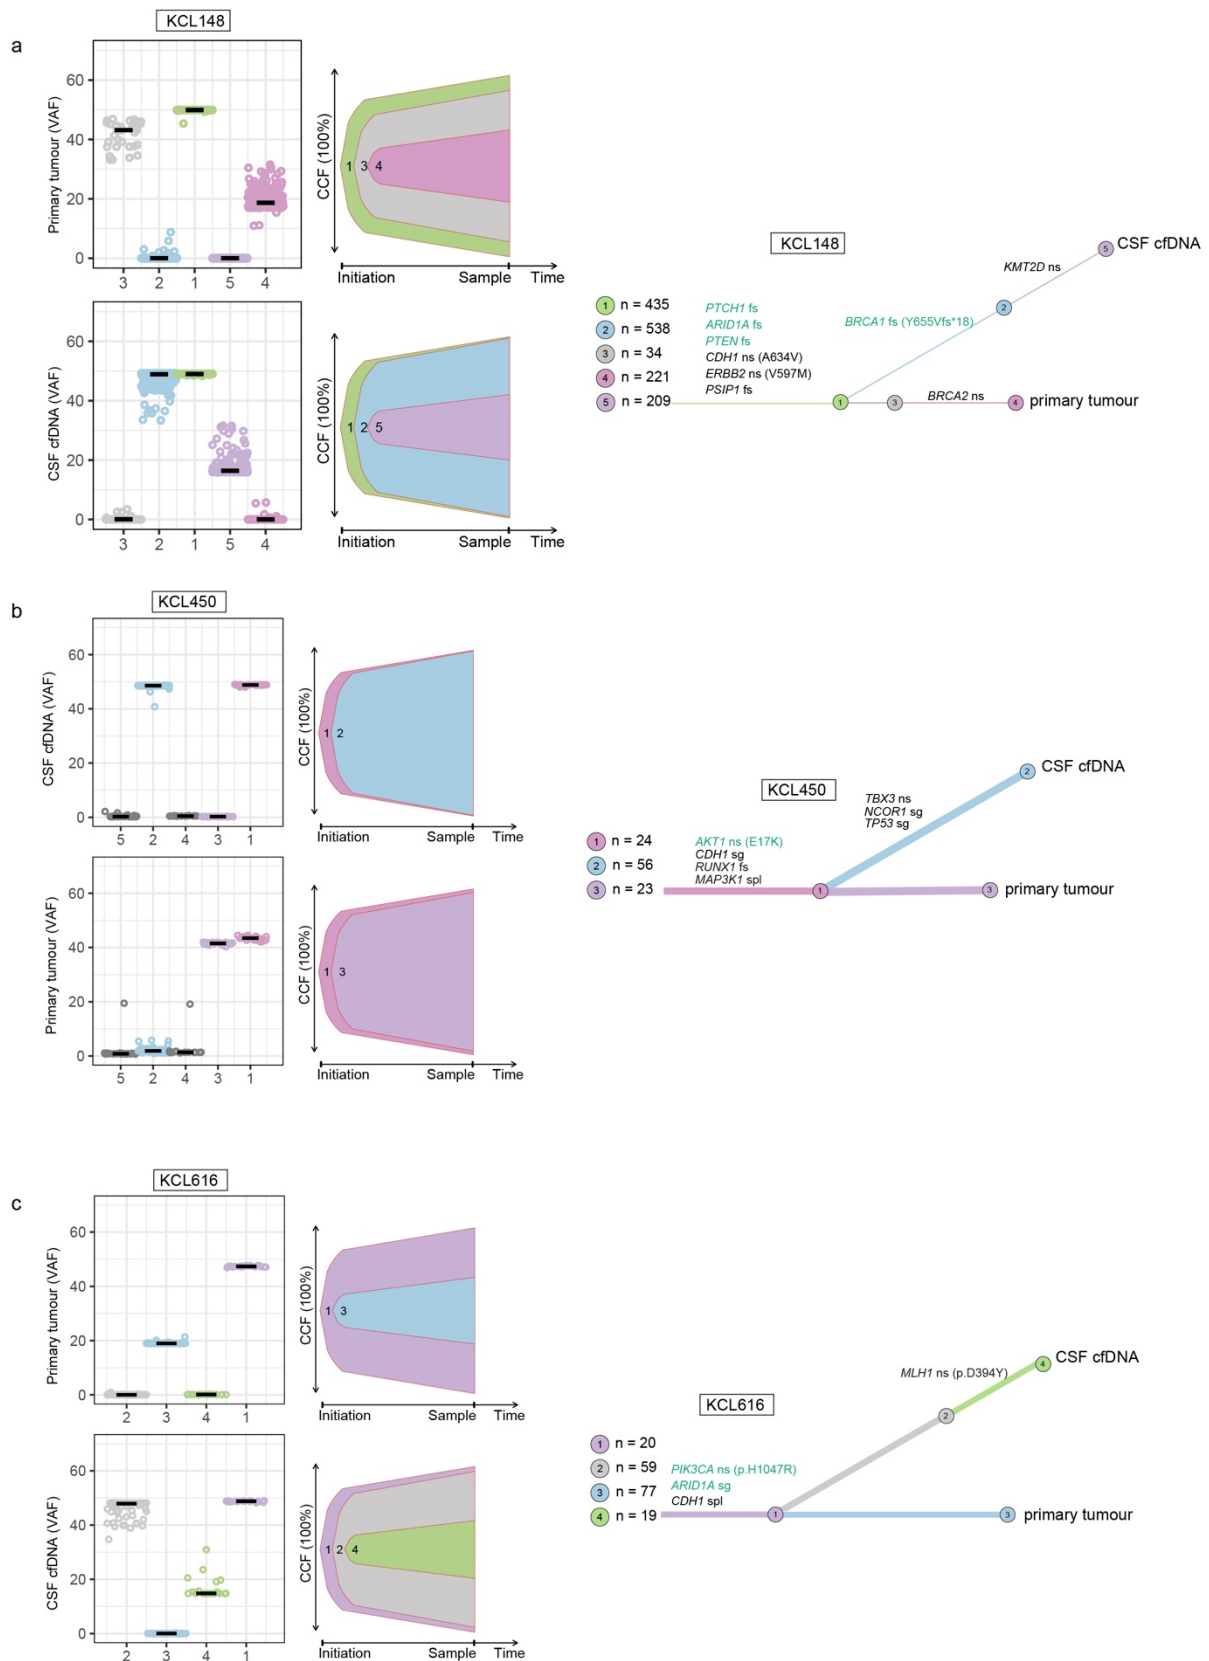

**Supplementary Fig. 12.** BCLM clonal evolution modelling. Data associated with Figure 2.

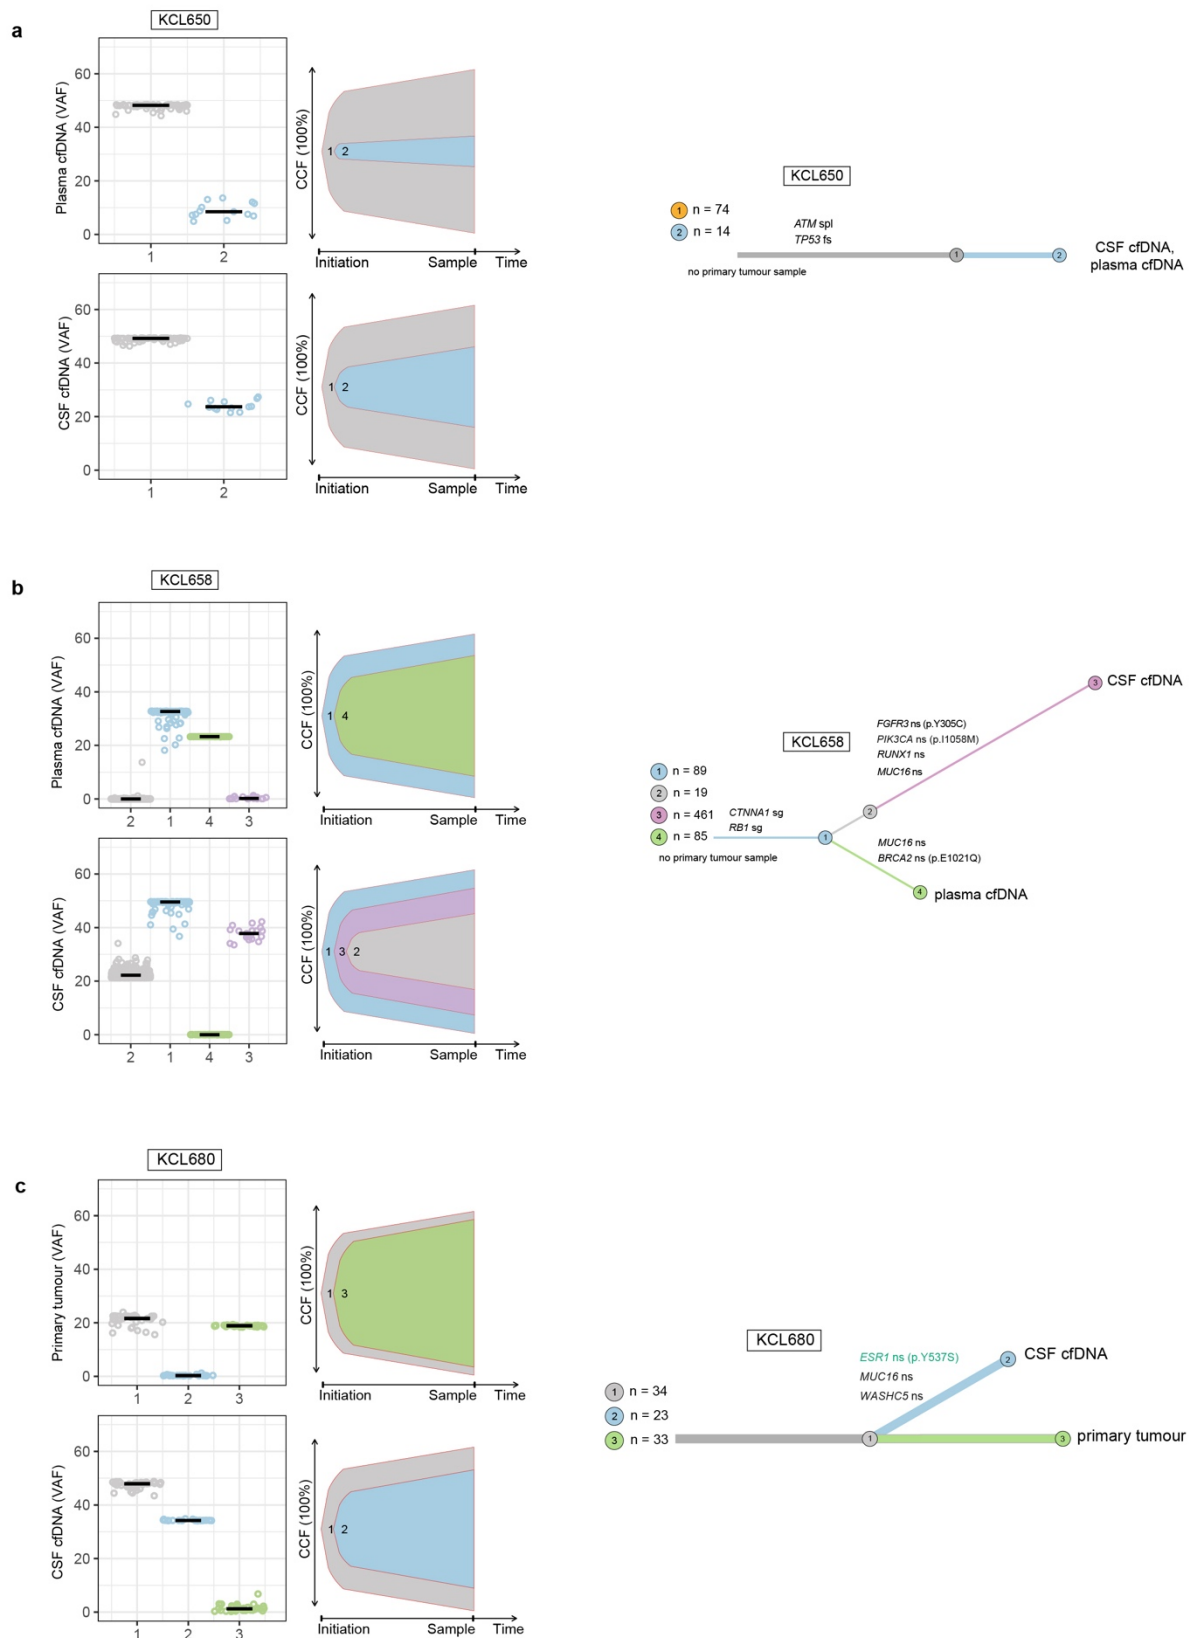

**Supplementary Fig. 13.** BCLM clonal evolution modelling. Data associated with Figure 2.

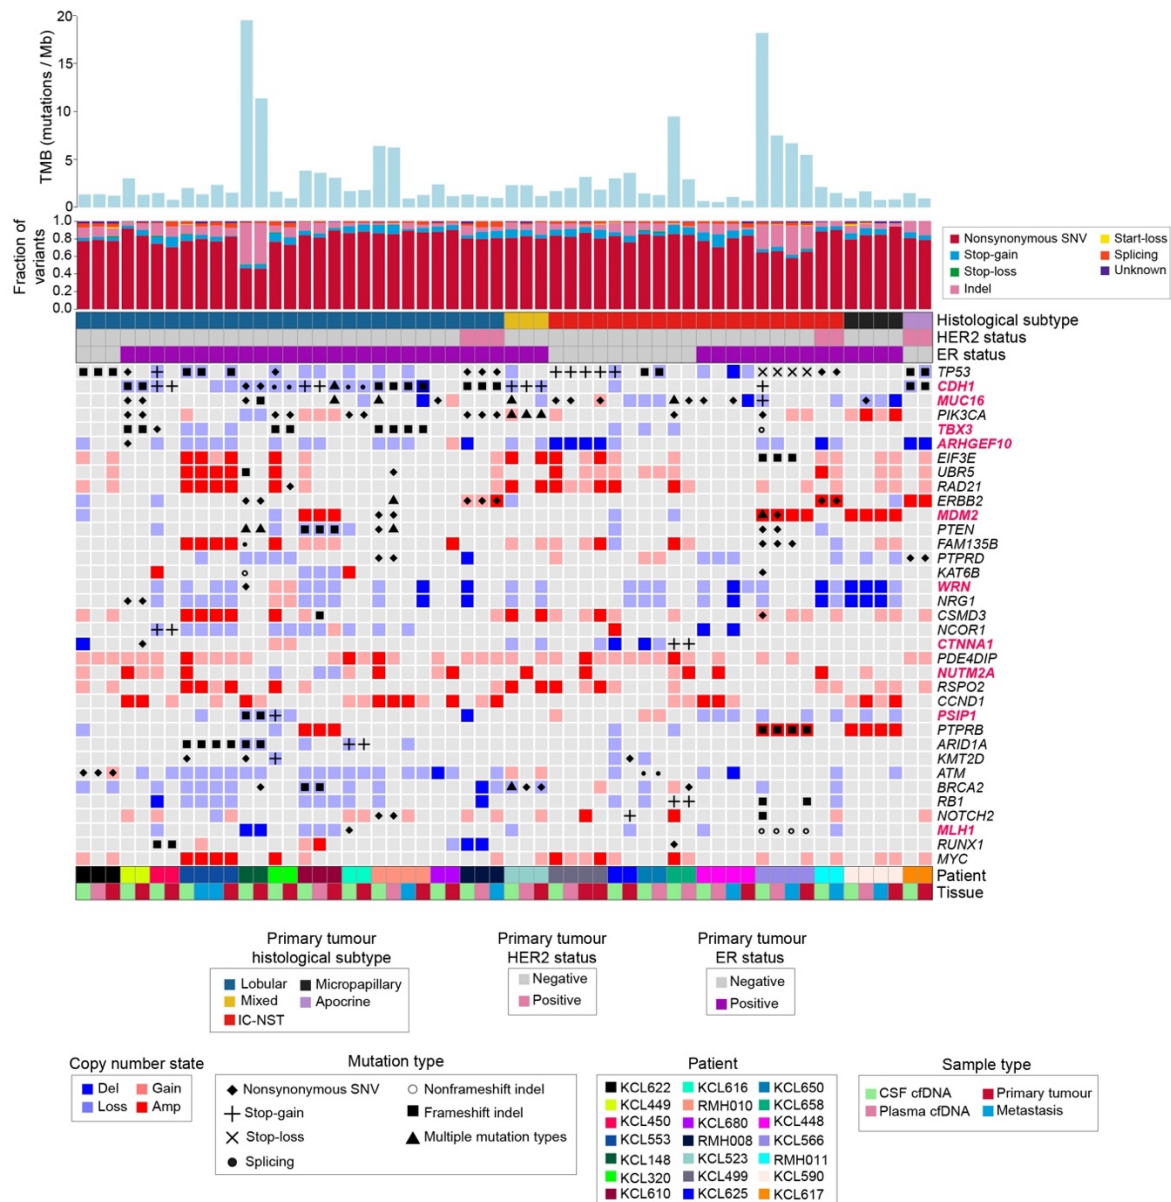

**Supplementary Fig. 14.** Cancer-associated mutation and copy number landscape of all matched samples. Associated with Fig. 3. Uppermost bar plot show tumour mutational burden (TMB) by sample. Stacked bar chart below shows mutational subtype for each sample as percentage of all variants (excluding synonymous). Banners indicate primary tumour histological subtype and HER2 and ER status. Main plot shows the 36 most frequently cancer-associated altered genes (alterations include mutation and high-level copy number events) in CSF cfDNA as follows; Cancer Gene Census (CGC) gene altered in at least 4 cases; breast cancer driver gene (definition in Methods) altered in at least 3 cases. Gene names are highlighted in red if genomic alteration rate was significantly different ( $p \leq 0.05$  by Chi-square test two-sided) in BCLM cohort compared to a publicly available dataset of 216 metastatic breast cancer (MBC cohort) samples (see Methods). Extended data in Supplementary Data 4 displays the significance values for this comparison.



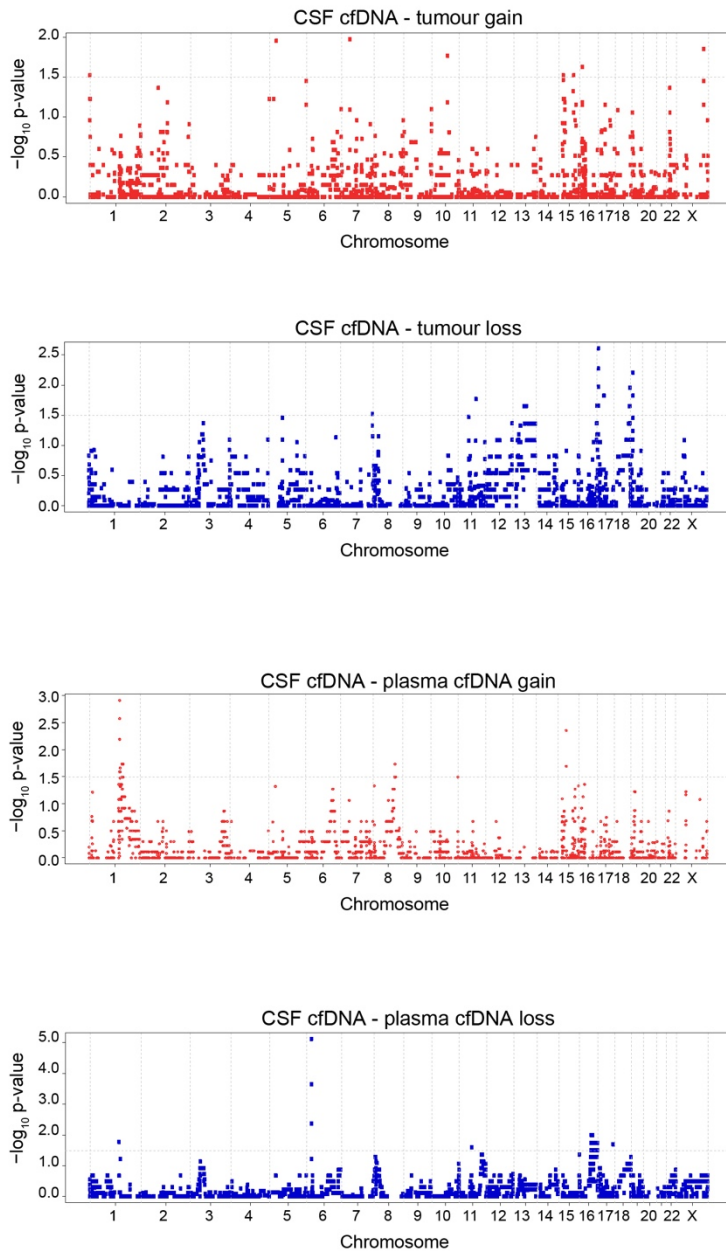

**Supplementary Fig. 15.** Comparison of CNA frequency between sample type. Associated with Fig. 4a,b. Copy number alteration (CNA) across the genome was determined using WES and adjusted for sample purity and ploidy. Differences in CNA frequency between sample types were analysed with two-sided tests of equal proportions, comparing CSF cfDNA and tumour ( $n = 17$  pairs), and CSF cfDNA and plasma cfDNA ( $n = 11$ ). Genome-wide plots show the inverse p-value ( $-\log_{10}$  p-value) of the significance of CNA frequency difference, where each datapoint represents a gene.

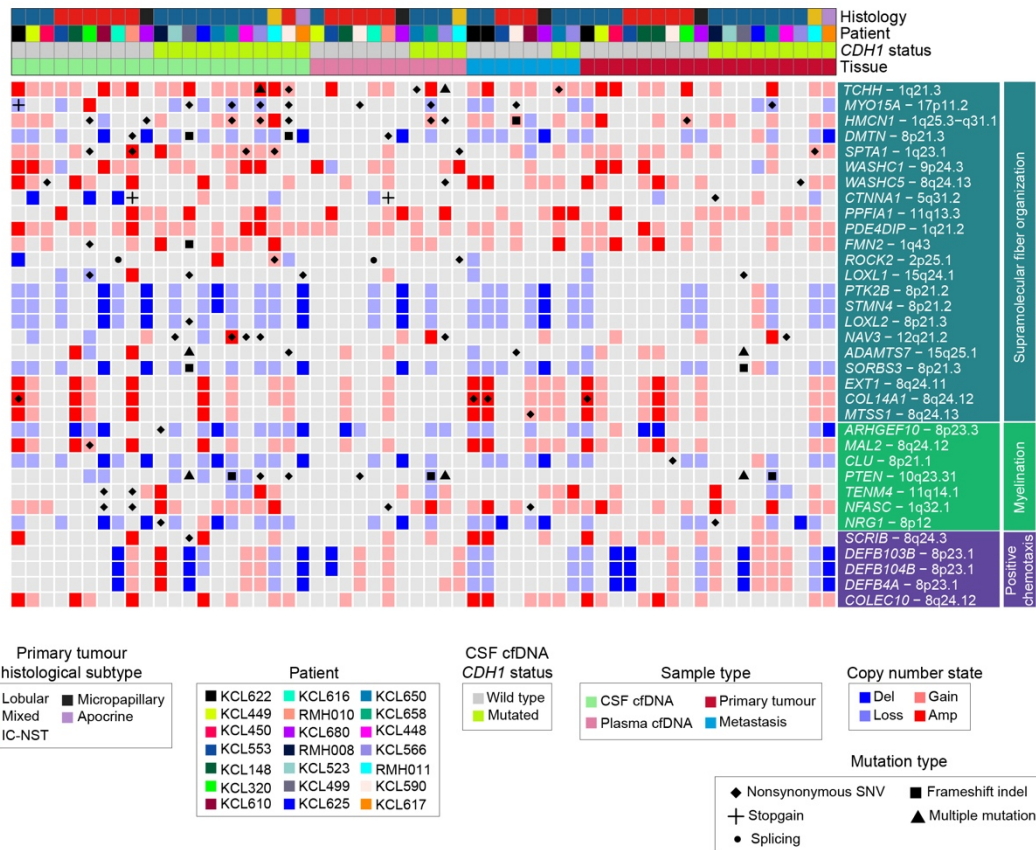

**Supplementary Fig. 16.** BCLM-enriched genomic alterations in biological processes. Associated with Fig. 4d. Genomic alterations in GO biological processes with  $-\log_{10}$  p-value  $\geq 3.0$  for enrichment in CSF cfDNA vs. primary tumour. Genomic alterations are shown for all sample types in 21 individuals. Banners above indicate; primary tumour histological subtype, patients, *CDH1* mutation status of CSF cfDNA and sample type.

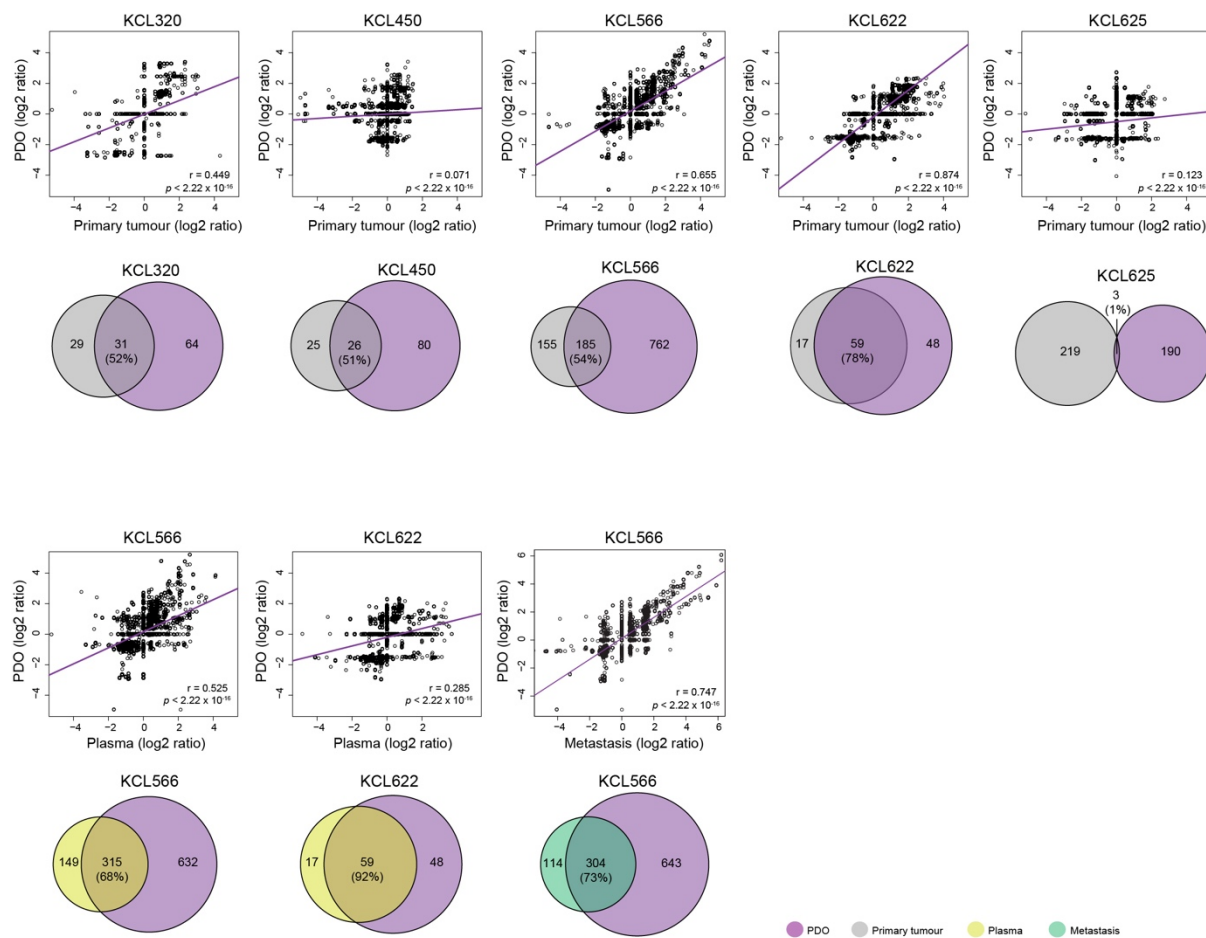

**Supplementary Fig. 17.** Comparison of genomic findings in BCLM PDOs and matched primary tumour, plasma cfDNA or metastatic tissue samples. Associated with Fig. 6a. Top panel, correlation plots of CNA (standardised log<sub>2</sub> ratio, one data point per gene) with regression line plotted (purple) and Pearson's  $r$  value plus two-sided significance values are shown. Lower panel, shared variants between primary tumour, metastasis or plasma cfDNA and BCLM PDO. Numbers within circles show mutation count, with the percentage showing variants in sample which also detected in BCLM PDO.

**Supplementary Figure 18**

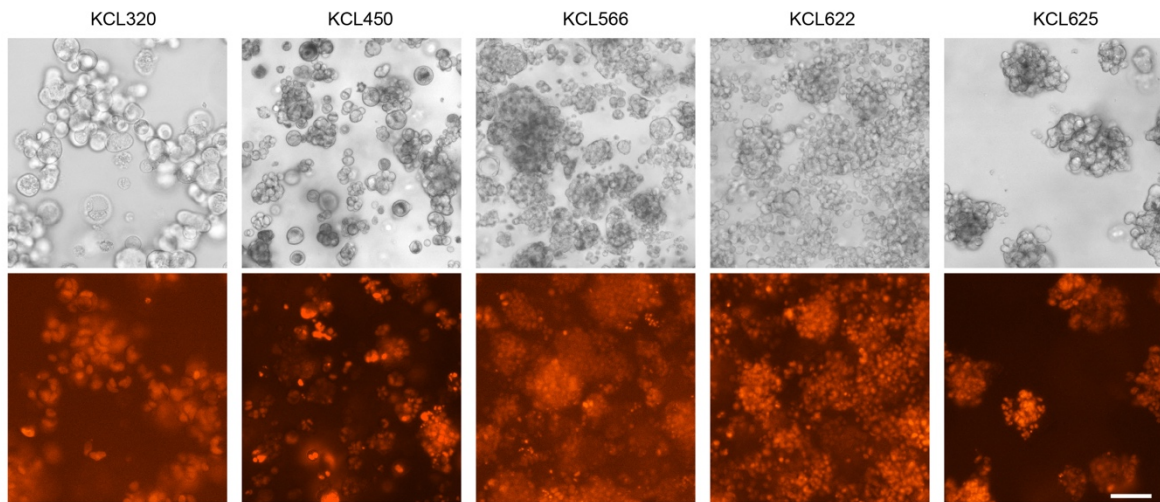

**Supplementary Fig. 18.** Transduction of BCLM PDOs to express mCherry and luciferase. PDOs were transduced with a lentivirus encoding luciferase and mCherry (mChLuc2) and imaged on an EVOS microscope during 3D culture in bright field and fluorescence mode. Scale bar, 100  $\mu$ m.
